# Supplementary material
Source: PubMed Central journal article supplement (PMC2810830)
Supplement: NIHMS161069-supplement-1_si_001.pdf [file NIHMS161069-supplement-1_si_001.pdf]

SAX fractions 22 and 27: CID fragments and identifications

| m/z    | Rel. Int. |        | charge | M_exp   | I.D.            | M_theo  |
|--------|-----------|--------|--------|---------|-----------------|---------|
|        | Fr. 22    | Fr. 27 |        |         |                 |         |
| 277.06 | 0.6       | 2.0    | 1      | 278.07  | 0,2 A2 (0S)     | 278.06  |
| 286.54 | 2.6       | 3.1    | 2      | 575.09  | B3 (1S)         | 575.08  |
| 326.51 | 5.7       | 7.0    | 2      | 655.04  | B3(2S)          | 655.04  |
| 329.71 | 0.1       | 6.9    | 3      | 992.15  | B5 (2S)         | 992.14  |
| 335.71 | 6.1       | 37.2   | 3      | 1010.14 | C5 (2S)         | 1010.15 |
| 349.71 | 8.0       | 29.3   | 3      | 1052.16 | 2,4 A6 (2S)     | 1052.16 |
| 356.36 | 0.1       | 15.8   | 3      | 1072.11 | B5 (3S)         | 1072.09 |
| 362.37 | 1.6       | 7.0    | 3      | 1090.13 | C5(3S)          | 1090.10 |
| 367.08 | 15.2      | 7.5    | 2      | 736.17  | B4(1S)          | 736.15  |
| 369.72 | 13.3      | 37.6   | 3      | 1112.17 | 0,2 A6 (2S)     | 1112.18 |
| 376.08 | 0.7       | 5.4    | 2      | 754.18  | 2,4 X3 (1S, Ac) | 754.16  |
| 391.38 | 0.9       | 1.3    | 3      | 1177.17 | 0,2 X5 (3S, Ac) | 1177.17 |
| 396.38 | 14.1      | 33.4   | 3      | 1192.16 | 0,2 A6 (3S)     | 1192.14 |
| 403.40 | 14.0      | 22.1   | 3      | 1213.24 | precursor - SO3 | 1213.23 |
| 407.05 | 75.0      | 43.8   | 2      | 816.12  | B4 (2S)         | 816.10  |
| 416.06 | 3.9       | 36.9   | 2      | 834.13  | C4(2S)          | 834.12  |
| 424.06 | 2.4       | 5.8    | 3      | 1275.19 | precursor - H2O | 1275.17 |
| 430.05 | 100       | 100    | 3      | 1293.18 | precursor       | 1293.18 |
| 447.03 | 4.3       | 3.4    | 2      | 896.08  | B4 (3S)         | 896.06  |
| 455.09 | 1.7       | 6.8    | 2      | 912.20  | B5(1S)          | 912.18  |
| 486.62 | 1.5       | 1.7    | 2      | 975.26  | Y5 (1S, Ac)     | 975.25  |
| 495.07 | 3.7       | 15.2   | 2      | 992.15  | B5 (2S)         | 992.14  |
| 504.08 | 1.1       | 2.8    | 2      | 1010.17 | C5 (2S)         | 1010.15 |
| 515.11 | 14.9      | 19.0   | 2      | 1032.24 | 0,2 A6 (1S)     | 1032.22 |
| 526.61 | 9.9       | 9.6    | 2      | 1055.23 | Y5 (2S, Ac)     | 1055.21 |
| 547.61 | 1.5       | 1.6    | 2      | 1097.23 | 0,2 X5 (2S, Ac) | 1097.22 |
| 555.09 | 55.7      | 79.1   | 2      | 1112.20 | 0,2 A6 (2S)     | 1112.18 |
| 595.07 | 1.4       | 2.0    | 2      | 1192.15 | 0,2 A6 (3S)     | 1192.14 |

Supplemental Table 1. All fragment ions from fractions 22 and 27 present above 1% relative abundance are listed using the Domon and Costello nomenclature<sup>68</sup>.

Experimental and theoretical masses are listed as M\_exp and M\_theo, respectively.
